# Supplementary material
Source: PubMed Central journal article supplement (PMC2574810)

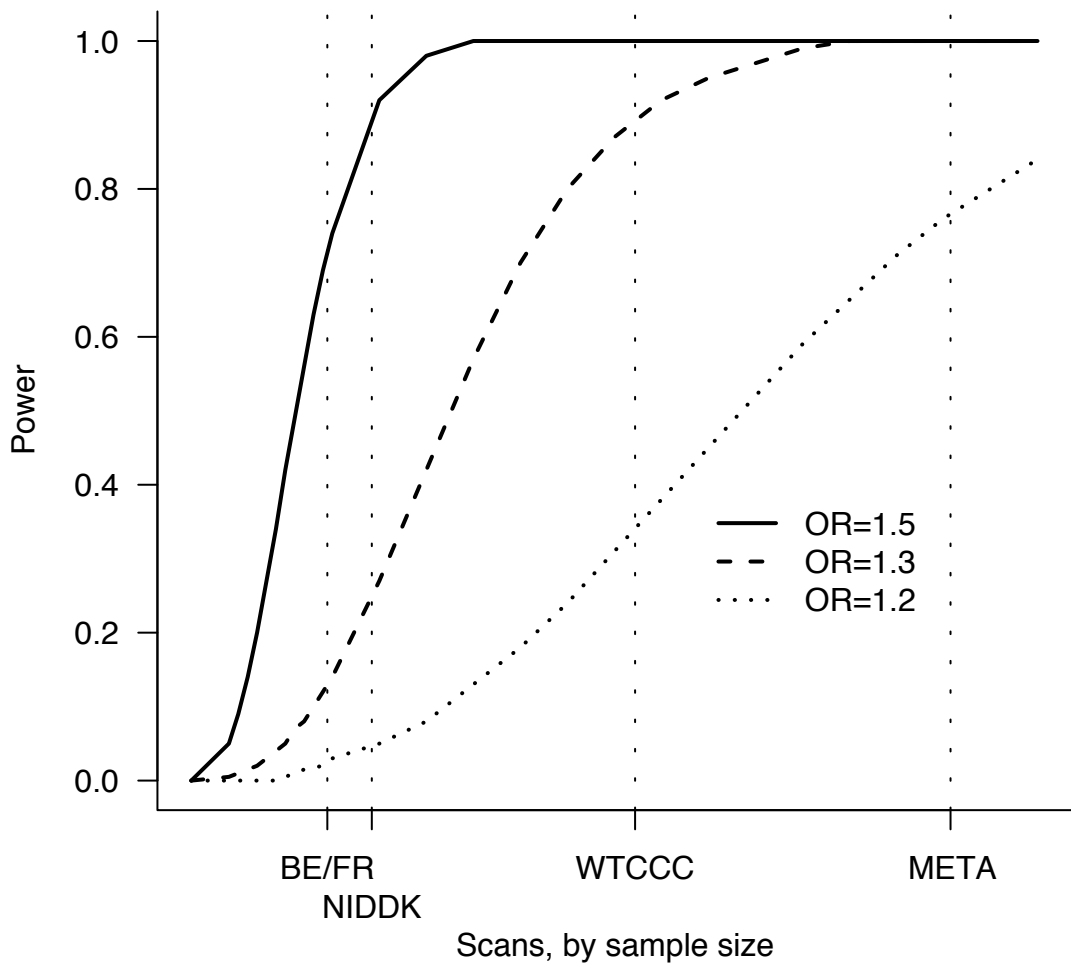

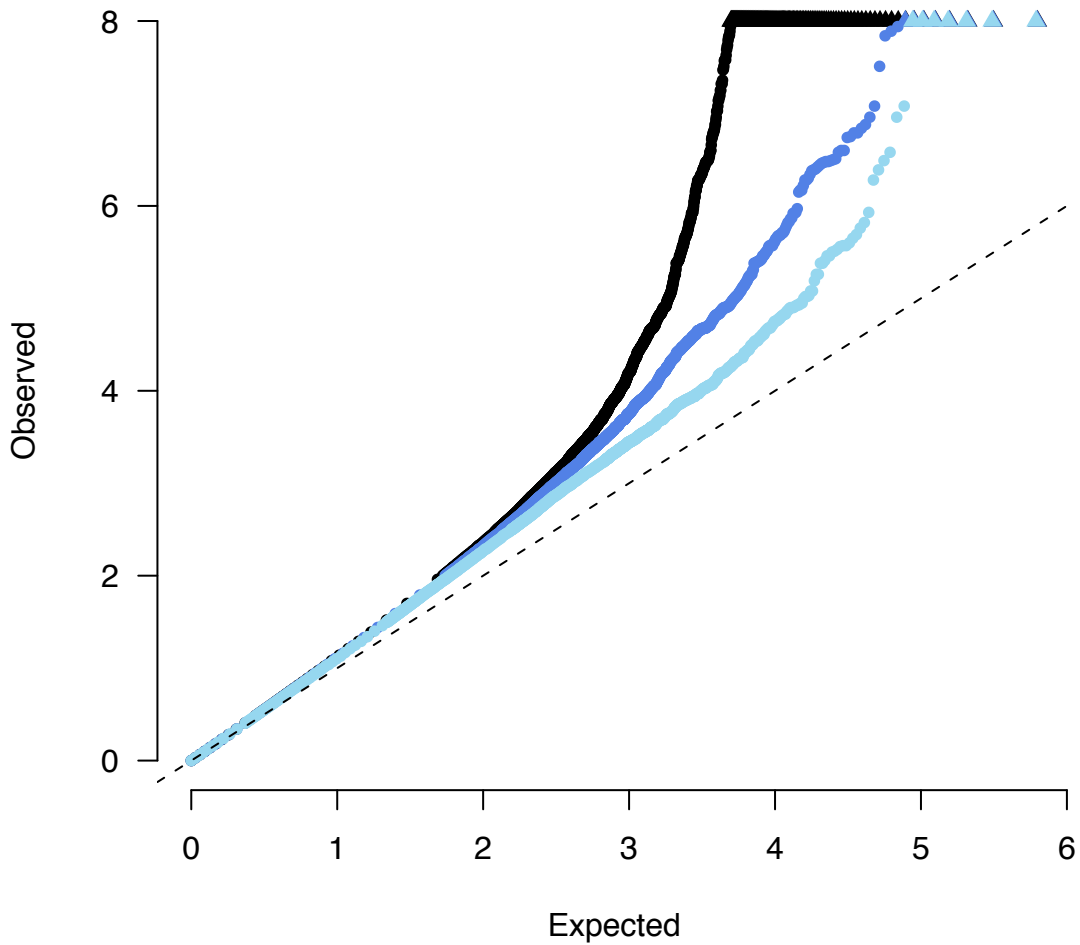

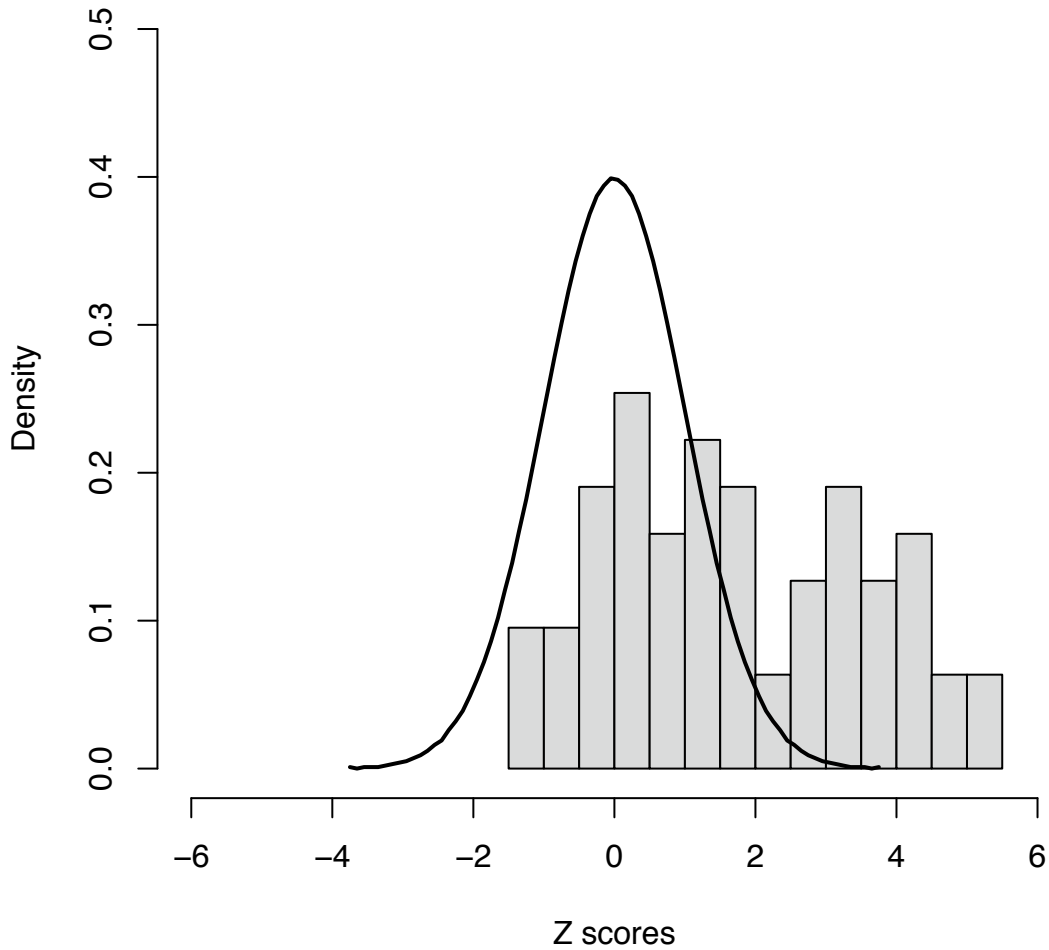

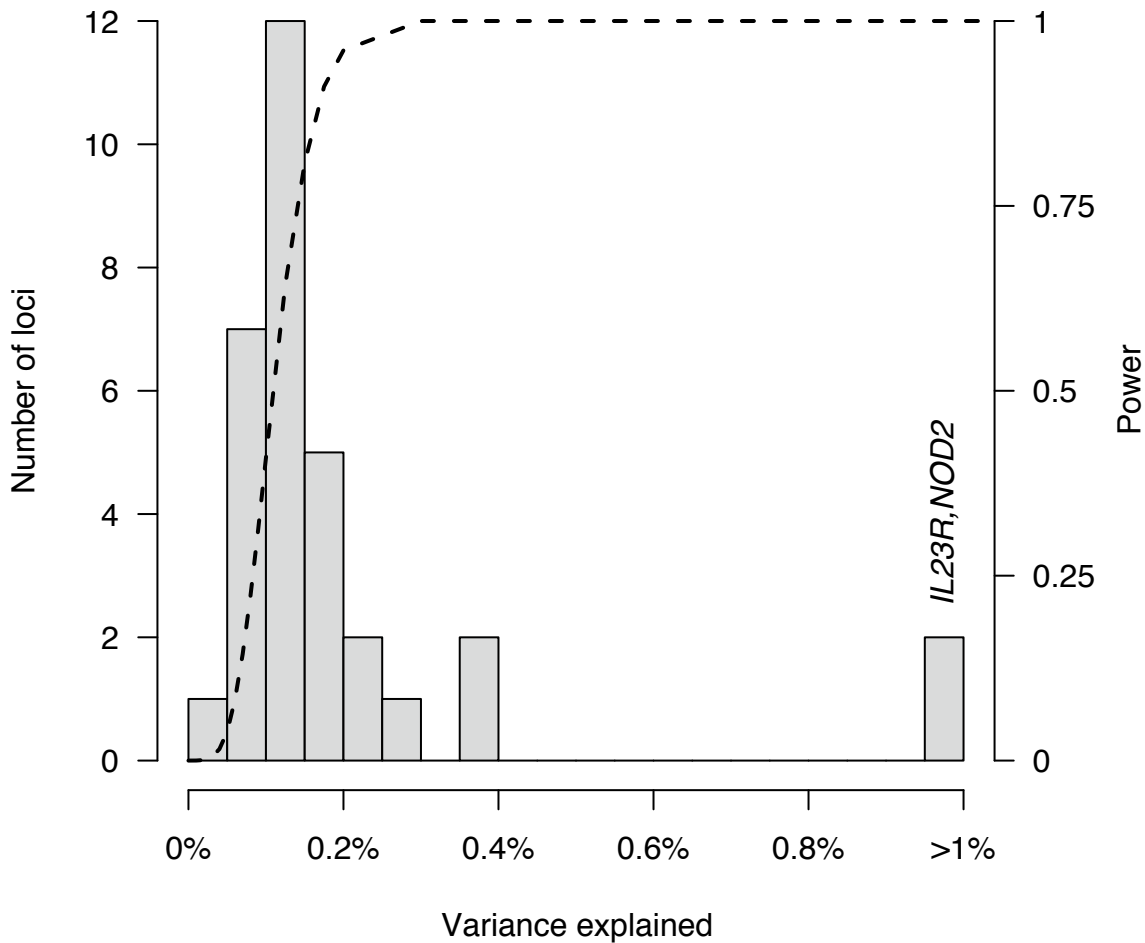

Supplement: NIHMS53734-supplement-figs.pdf [file NIHMS53734-supplement-figs.pdf]
